# Supplementary material
Source: PubMed Central journal article supplement (PMC5710286)
Supplement: jamaotolaryngolheadnecksurg-143-928-s001.pdf [file jamaotolaryngolheadnecksurg-143-928-s001.pdf]

## Supplementary Online Content

Le Clercq CMP, van Ingen G, Ruytjens L, et al. Prevalence of Hearing Loss Among Children 9 to 11 Years Old: The Generation R Study. *JAMA Otolaryngol Head Neck Surg*. Published online July 27, 2017. doi:10.1001/jamaoto.2017.1068

**eFigure 1.** Flow chart of the Generation R Study participation

**eFigure 2.** Flow chart of questionnaire data used to define otitis media phenotypes

**eTable 1.** Characteristics and comparison of study participants vs. non-participants

**eTable 2.** Hearing thresholds for the total study cohort, and for ears with normal and abnormal tympanograms

This supplementary material has been provided by the authors to give readers additional information about their work.

**eFigure 1. Flow chart of the Generation R Study participation**

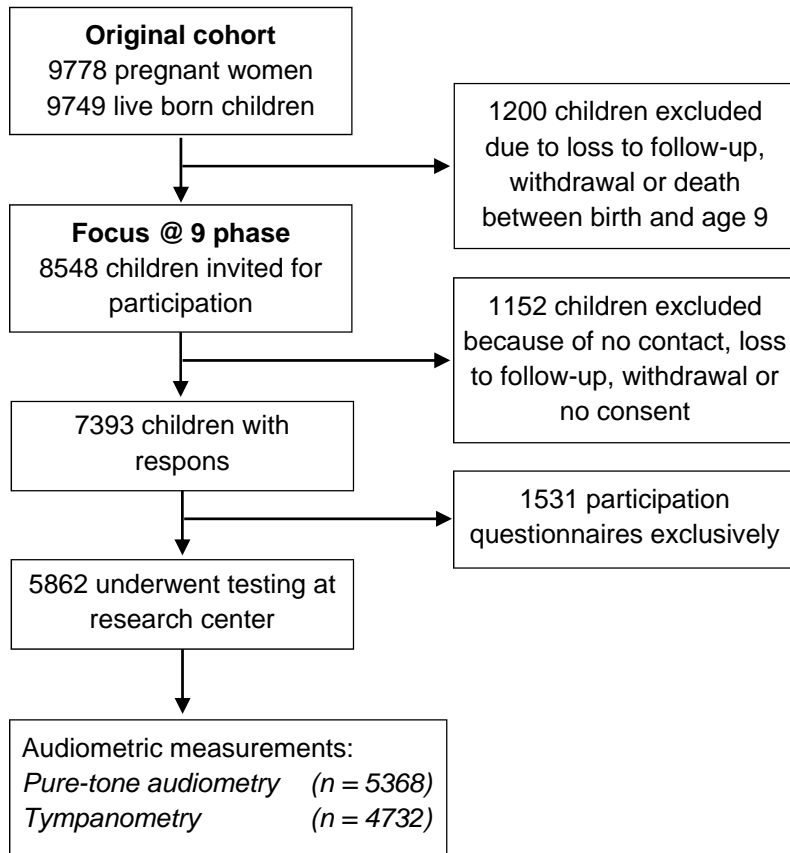

**eFigure 2. Flow chart of questionnaire data used to define otitis media phenotypes.**

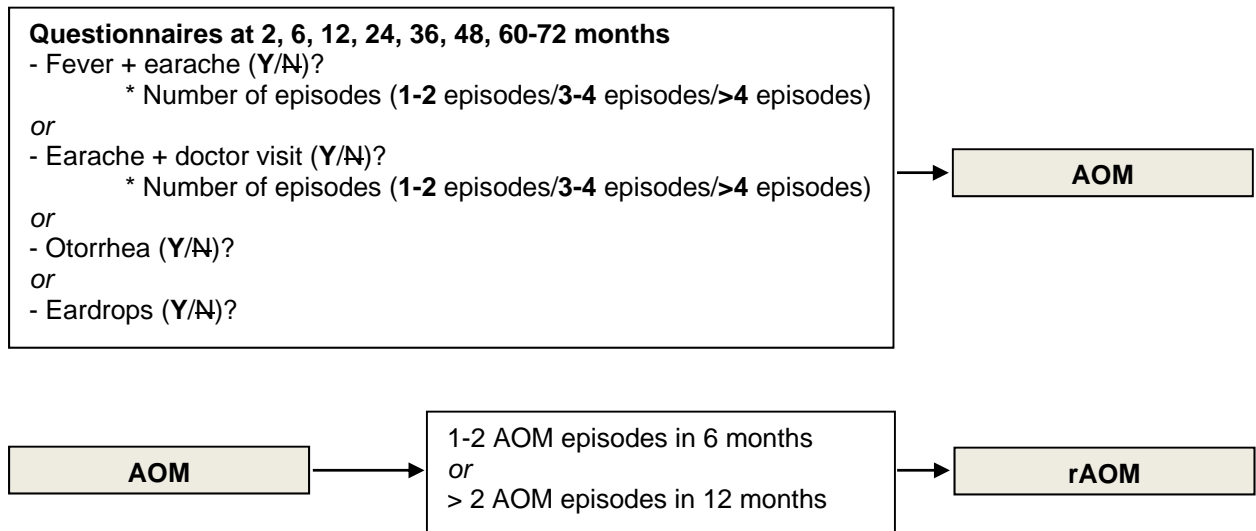

**eTable 1. Characteristics and comparison of study participants vs. non-participants.**

| Characteristic     |               | Tested at research center |             | Difference | 95% CI        |
|--------------------|---------------|---------------------------|-------------|------------|---------------|
|                    |               | Yes, n (%)                | No, n (%)   | %          |               |
| Year of birth      | 2002          | 578 (9.9)                 | 374 (9.6)   | 0.24       | -0.97 - 1.44  |
|                    | 2003          | 1936 (33.0)               | 1315 (33.8) | -0.80      | -2.72 - 1.11  |
|                    | 2004          | 1700 (29.0)               | 1174 (30.2) | -1.20      | -3.06 - 0.65  |
|                    | 2005          | 1626 (27.7)               | 1018 (26.2) | 1.55       | -0.25 - 3.34  |
|                    | 2006          | 22 (0.4)                  | 6 (0.2)     | 0.22       | 0.02 - 0.42   |
| Sex                | Male          | 2913 (49.7)               | 2024 (52.1) | 2.40       | 0.37 - 4.42   |
|                    | Female        | 2948 (50.3)               | 1861 (47.9) |            |               |
| Ethnicity          | Caucasian     | 3898 (68.2)               | 1777 (52.6) | 15.64      | 13.57 - 17.71 |
|                    | Non Caucasian | 1815 (31.8)               | 1602 (47.4) |            |               |
| Maternal education | Higher        | 2953 (59.3)               | 586 (46.0)  | 13.34      | 10.28 - 16.40 |
|                    | Not higher    | 2027 (40.7)               | 689 (54.0)  |            |               |

**eTable 2. Hearing thresholds for the total study cohort, and for ears with normal and abnormal tympanograms.**

| Ear          | Frequency (Hz) | Hearing Threshold (dB HL) <sup>a</sup> |                    |                      | Absolute difference (dB HL) | 95% CI    |
|--------------|----------------|----------------------------------------|--------------------|----------------------|-----------------------------|-----------|
|              |                | Total Cohort                           | Normal Tympanogram | Abnormal Tympanogram |                             |           |
| <i>Right</i> |                | <i>N</i> = 5368                        | <i>n</i> = 3289    | <i>n</i> = 1055      |                             |           |
|              | 500            | 10.04 (7.06)                           | 8.73 (6.14)        | 13.63 (7.59)         | 4.90                        | 4.40-5.41 |
|              | 1000           | 7.44 (6.58)                            | 6.14 (5.66)        | 10.82 (7.24)         | 4.68                        | 4.20-5.16 |
|              | 2000           | 6.82 (6.34)                            | 6.40 (5.91)        | 7.39 (6.78)          | 0.99                        | 0.56-1.44 |
|              | 3000           | 8.09 (6.37)                            | 7.50 (5.99)        | 9.30 (6.50)          | 1.80                        | 1.36-2.25 |
|              | 4000           | 8.86 (7.34)                            | 7.94 (6.81)        | 10.93 (7.98)         | 2.99                        | 2.46-3.53 |
|              | 6000           | 7.70 (7.87)                            | 7.04 (8.73)        | 8.88 (9.22)          | 1.84                        | 1.21-2.48 |
|              | 8000           | 14.72 (9.86)                           | 13.83 (9.17)       | 16.79 (10.65)        | 2.96                        | 2.24-3.67 |
| <i>Left</i>  |                | <i>N</i> = 5368                        | <i>n</i> = 3301    | <i>n</i> = 997       |                             |           |
|              | 500            | 10.00 (7.21)                           | 8.60 (6.18)        | 14.29 (8.26)         | 5.69                        | 5.13-6.24 |
|              | 1000           | 7.10 (6.78)                            | 5.73 (5.72)        | 11.10 (7.86)         | 5.67                        | 4.84-5.89 |
|              | 2000           | 6.63 (6.61)                            | 6.19 (6.23)        | 7.58 (7.47)          | 1.39                        | 0.88-1.90 |
|              | 3000           | 7.82 (6.39)                            | 7.09 (5.83)        | 9.61 (7.26)          | 2.52                        | 2.03-3.02 |
|              | 4000           | 8.99 (7.36)                            | 7.95 (6.49)        | 11.76 (8.68)         | 3.81                        | 3.23-4.40 |
|              | 6000           | 8.71 (9.04)                            | 7.98 (8.48)        | 10.41 (10.19)        | 2.43                        | 1.73-3.13 |
|              | 8000           | 11.47 (10.01)                          | 10.42 (9.27)       | 13.70 (11.19)        | 3.29                        | 2.52-4.05 |

<sup>a</sup> Hearing thresholds are presented as mean (SD).
